# Supplementary material for: Zebrafish Whole-Adult-Organism Chemogenomics for Large-Scale Predictive and Discovery Chemical Biology
Source: PubMed Central journal article supplement (PMC2442223; doi:10.1371/journal.pgen.1000121), 2008-07-11
Supplement: pgen.1000121.s001.pdf [file pgen.1000121.s001.pdf]

# A. Chemical Treatments

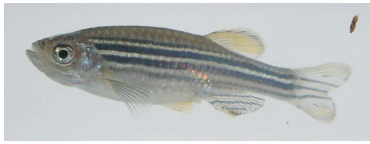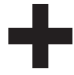

16 chemicals  
(Experiments A & B)

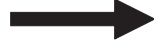

# B. Microarray

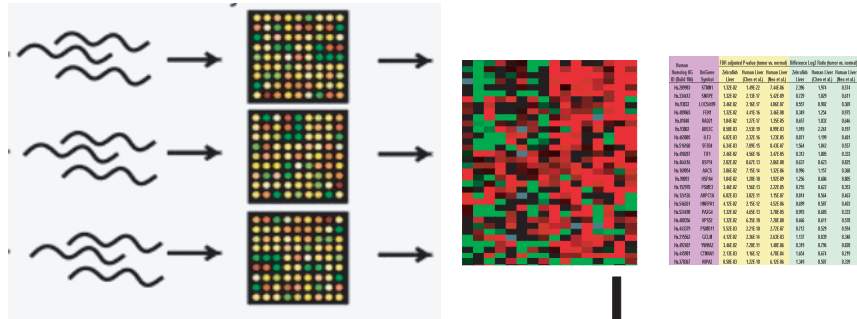

RNA  
extraction

Exp. A  
Datasets  
I & II

Exp. B  
Datasets  
III & IV

# C. Differential Gene Expression Analyses for P(H)AH/BAP and ECs/DES groups only

|                 | A      | B      | C      | D      | E      | F      | G      | H       | I       | J      | K | L      |
|-----------------|--------|--------|--------|--------|--------|--------|--------|---------|---------|--------|---|--------|
| 1 GenBankGene   |        |        |        |        |        |        |        |         |         |        |   |        |
| 2 AF256268.vg   | 7.6708 | 8.0293 | 8.826  | 7.0439 | 7.6252 | 8.2518 | 7.2309 | 0.0677  |         |        |   | -0.087 |
| 3 AF408784.vg   | 6.92   | 7.1708 | 7.3611 | 7.002  | 7.6841 | 8.1765 | 8.1765 | 0.1689  | -0.1796 | -0.139 |   |        |
| 4 U08051.ppt    | 4.2201 | 5.0350 | 4.8545 | 4.6961 | 4.0280 | 5.4729 | 5.0122 | 0.3344  | -0.134  | -0.161 |   |        |
| 5 AL078269.mnt  | 2.6124 | 3.4532 | 1.9988 | 2.3661 | 3.475  | 4.1693 | 3.2075 | -0.0874 | 0.0967  | 0.419  |   |        |
| 6 BC088184.cpn1 | 3.023  | 3.3362 | 3.0283 | 2.896  | 3.0939 | 2.9536 | 3.2123 | -0.0543 | 0.3607  | -0.145 |   |        |
| 7 AF029577.vg   | 3.9007 | 1.3200 | 1.4844 | 1.1636 | 1.44   | 1.1179 | 1.1688 | -0.4056 | 0.116   | -0.338 |   |        |
| 8 BP156109.dh   | 2.8124 | 3.4532 | 1.9988 | 2.3661 | 3.475  | 4.1693 | 3.2075 | -0.0874 | 0.0967  | 0.419  |   |        |

Genes  
sorted by  
P-values

Genes  
sorted by  
FDR-  
values

Genes  
sorted by  
Q-values  
(SAM)

Test of Significance for each  
gene (Treated vs. Control)

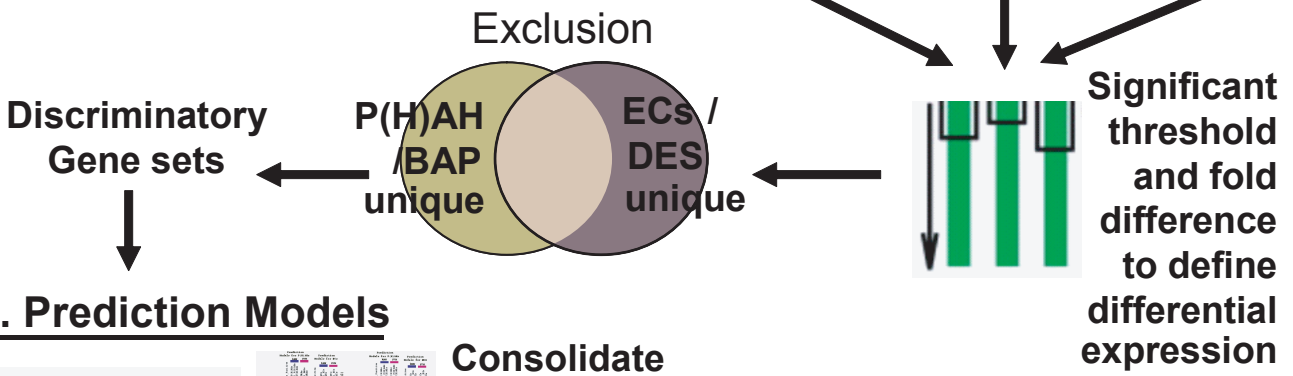

# D. Prediction Models

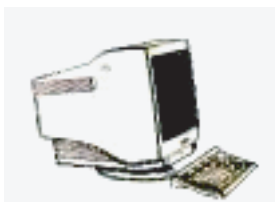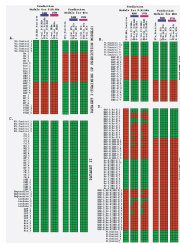

Training using Supervised Learning Classifiers (kNN and SVM). Assess robustness using leave-one-out approach or independent datasets.

Consolidate  
Gene Sets

# E. Real-time PCR Validation of Candidate Biomarkers

# F. Identification of Biomarkers in Selected Tissues Using Real-time PCR on a New Batch of Fish (Exp.C)

# G. Knowledge-based Data Mining for Human Health-risk and Biological Insight Inference

Supplementary Figure 1: An overview of the workflow for large-scale predictive and discovery chemical biology using whole adult zebrafish chemogenomics.
