# Supplementary material for: Zebrafish Whole-Adult-Organism Chemogenomics for Large-Scale Predictive and Discovery Chemical Biology
Source: PubMed Central journal article supplement (PMC2442223; doi:10.1371/journal.pgen.1000121), 2008-07-11
Supplement: pgen.1000121.s003.pdf [file pgen.1000121.s003.pdf]

**Supplementary Table 1. Array samples and concentration of chemical treatments used in the study**

**EXPERIMENT A (Expression Chemogenomics)**

| <b>Group I Samples (Dataset I)</b> |                                                                        |                                                                                                           | <b>Group II Samples (Dataset II)</b> |                                                        |                         |                                                     |  |
|------------------------------------|------------------------------------------------------------------------|-----------------------------------------------------------------------------------------------------------|--------------------------------------|--------------------------------------------------------|-------------------------|-----------------------------------------------------|--|
| V2.Control_1                       | Vehicle alone<br>acetone 0.05%<br>(Merck, Germany)                     | <b>Control*</b>                                                                                           | W2.Control_1                         | water<br>(control)                                     |                         |                                                     |  |
| V2.Control_2                       |                                                                        |                                                                                                           | W2.Control_2                         |                                                        |                         |                                                     |  |
| V2.Control_3                       |                                                                        |                                                                                                           | W2.Control_3                         |                                                        |                         |                                                     |  |
| V2.Control_4                       |                                                                        |                                                                                                           | W2.Control_4                         |                                                        |                         |                                                     |  |
| V2.Control_5                       |                                                                        |                                                                                                           | W2.Control_5                         |                                                        |                         |                                                     |  |
| Es_1                               | 17-beta estradiol<br>1ug/L (3.67nM)<br>(Sigma, USA)                    | <b>Combined<br/>groups of<br/>Estrogenic<br/>Compounds<br/>(ECs)*</b>                                     | Cd_1                                 | Cadmium chloride<br>3mg/L (16.4uM)<br>(Sigma, USA)     | <b>Heavy<br/>Metals</b> |                                                     |  |
| Es_2                               |                                                                        |                                                                                                           | Cd_2                                 |                                                        |                         |                                                     |  |
| Es_3                               |                                                                        |                                                                                                           | Cd_3                                 |                                                        |                         |                                                     |  |
| Es_4                               |                                                                        |                                                                                                           | Cd_4                                 |                                                        |                         |                                                     |  |
| Bis_5                              |                                                                        |                                                                                                           | Cd_5                                 |                                                        |                         |                                                     |  |
| Bis_1                              | Bisphenol A<br>5mg/L (21.9uM)<br>(Aldrich, USA)                        |                                                                                                           | Hg_1                                 | Mercuric chloride<br>0.2mg/L (734nM)<br>(Aldrich, USA) |                         |                                                     |  |
| Bis_2                              |                                                                        |                                                                                                           | Hg_2                                 |                                                        |                         |                                                     |  |
| Bis_3                              |                                                                        |                                                                                                           | Hg_3                                 |                                                        |                         |                                                     |  |
| DES_3                              | Diethylstilbestrol<br>1ug/L (3.73nM)<br>(Sigma, USA)                   |                                                                                                           | Hg_4                                 |                                                        |                         | 4-Nitrophenol<br>5mg/L (35.9uM)<br>(Merck, Germany) |  |
| DES_6                              |                                                                        |                                                                                                           | Hg_5                                 |                                                        |                         |                                                     |  |
| DES_2                              |                                                                        |                                                                                                           | NP_1                                 |                                                        |                         |                                                     |  |
| DES_8                              |                                                                        |                                                                                                           | NP_2                                 |                                                        |                         |                                                     |  |
| BAP_1                              |                                                                        |                                                                                                           | NP_3                                 |                                                        |                         |                                                     |  |
| BAP_2                              | Benzo[a]pyrene<br>~5mg/L (~20.0uM)<br>(Sigma, USA)                     | <b>Combined<br/>groups of<br/>Polycyclic<br/>(Halogenated)<br/>Aromatic<br/>Hydrocarbons<br/>P(H)AHs*</b> | NP_4                                 | Organic<br>Nitrogen<br>Compounds                       |                         |                                                     |  |
| BAP_3                              |                                                                        |                                                                                                           | NP_5                                 |                                                        |                         |                                                     |  |
| BAP_4                              |                                                                        |                                                                                                           | CA_1                                 |                                                        |                         |                                                     |  |
| BAP_5                              |                                                                        |                                                                                                           | CA_2                                 |                                                        |                         |                                                     |  |
| MC_1                               |                                                                        |                                                                                                           | CA_3                                 |                                                        |                         |                                                     |  |
| MC_2                               | 3-Methyl-<br>cholanthrene<br>100ug/L (373nM)<br>(Sigma, USA)           |                                                                                                           | CA_4                                 | 4-Chloroaniline<br>20mg/L (157uM)<br>(Merck, Germany)  |                         |                                                     |  |
| MC_3                               |                                                                        |                                                                                                           | DEN_1                                |                                                        |                         |                                                     |  |
| MC_4                               |                                                                        |                                                                                                           | DEN_2                                |                                                        |                         |                                                     |  |
| TCDD_1                             |                                                                        |                                                                                                           | DEN_3                                |                                                        |                         |                                                     |  |
| TCDD_2                             |                                                                        |                                                                                                           | DEN_4                                |                                                        |                         |                                                     |  |
| TCDD_3                             | 2,3,7,8-Tetrachloro-<br>dibenzodioxin<br>10ug/L (31.1nM)<br>(CIL, USA) |                                                                                                           | DEN_5                                | Diethylnitrosamine<br>400mg/L (3.9mM)<br>(Sigma, USA)  |                         |                                                     |  |
| TCDD_5                             |                                                                        |                                                                                                           | Heptachlor_1                         |                                                        |                         |                                                     |  |
|                                    |                                                                        |                                                                                                           | Heptachlor_2                         |                                                        |                         |                                                     |  |
|                                    |                                                                        |                                                                                                           | Heptachlor_3                         |                                                        |                         |                                                     |  |
|                                    |                                                                        |                                                                                                           | Lindane_1                            |                                                        |                         |                                                     |  |
|                                    | Lindane<br>100ug/l (344nM)<br>(Aldrich, USA)                           |                                                                                                           | Lindane_2                            | Organochlorine<br>Pesticides                           |                         |                                                     |  |
|                                    |                                                                        |                                                                                                           | Lindane_3                            |                                                        |                         |                                                     |  |
|                                    |                                                                        |                                                                                                           | Lindane_5                            |                                                        |                         |                                                     |  |
|                                    |                                                                        |                                                                                                           | DDT_1                                |                                                        |                         |                                                     |  |
|                                    |                                                                        |                                                                                                           | DDT_2                                |                                                        |                         |                                                     |  |
|                                    | DDT<br>100ug/l (282nM)<br>(Supelco, USA)                               |                                                                                                           | DDT_3                                |                                                        |                         |                                                     |  |
|                                    |                                                                        |                                                                                                           | DDT_4                                |                                                        |                         |                                                     |  |
|                                    |                                                                        |                                                                                                           | DDT_5                                |                                                        |                         |                                                     |  |
|                                    |                                                                        |                                                                                                           | Atz_1                                |                                                        |                         |                                                     |  |
|                                    |                                                                        |                                                                                                           | Atz_2                                |                                                        |                         |                                                     |  |
|                                    | Atrazine<br>5mg/L (23.1uM)<br>(Supelco, USA)                           |                                                                                                           | Atz_3                                |                                                        |                         |                                                     |  |
|                                    |                                                                        |                                                                                                           | Atz_4                                |                                                        |                         |                                                     |  |
|                                    |                                                                        |                                                                                                           | Atz_5                                |                                                        |                         |                                                     |  |

\* Experimental groups that were used to obtain discriminatory gene sets for training of prediction models (dataset I).

Supplementary Table 1 (continued).

EXPERIMENT B (Expression Chemogenomics)

**Group III Samples (Dataset III)**

|              |                                |                                                      |
|--------------|--------------------------------|------------------------------------------------------|
| V.Control_1  | Vehicle alone<br>acetone 0.01% | <b>(Control)*</b>                                    |
| V.Control_10 |                                |                                                      |
| V.Control_5  |                                |                                                      |
| V.Control_7  |                                |                                                      |
| V.Control_8  |                                |                                                      |
| V.Control_9  |                                |                                                      |
| BAP-H_2      | BAP-H: ~500ug/L (~2000nM)      | <b>Combined groups of Benzo[a]pyrene (BAP) *</b>     |
| BAP-H_3      |                                |                                                      |
| BAP-H_4      |                                |                                                      |
| BAP-H_6      |                                |                                                      |
| BAP-H_7      |                                |                                                      |
| BAP-L_1      | BAP-L: ~50ug/L (~200nM)        |                                                      |
| BAP-L_2      |                                |                                                      |
| BAP-L_3      |                                |                                                      |
| BAP-L_6      |                                |                                                      |
| BAP-L_8      | DES-H: 10 ug/L (37.3nM)        |                                                      |
| DES-H_1      |                                |                                                      |
| DES-H_4      |                                |                                                      |
| DES-H_5      | DES-L: 1 ug/L (3.73nM)         | <b>Combined groups of Diethylstilbestrol (DES) *</b> |
| DES-H_9      |                                |                                                      |
| DES-L_3      |                                |                                                      |
| DES-L_4      |                                |                                                      |
| DES-L_5      |                                |                                                      |
| DES-L_6      |                                |                                                      |
| DES-L_7      |                                |                                                      |

**Group IV Samples (Dataset IV) [continued]**

|                    |                                                                                        |
|--------------------|----------------------------------------------------------------------------------------|
| As-H_DES-H_1       | As-H (Arsenic): 40mg/L (~4000nM)<br>DES-H: 10 ug/L (37.3nM)                            |
| As-H_DES-H_10      |                                                                                        |
| As-H_DES-H_3       |                                                                                        |
| As-H_DES-H_5       |                                                                                        |
| As-H_DES-H_6       |                                                                                        |
| As-H_DES-H_7       |                                                                                        |
| As-H_DES-H_8       |                                                                                        |
| As-L_DES-H_3       |                                                                                        |
| As-L_DES-H_4       |                                                                                        |
| As-L_DES-H_5       |                                                                                        |
| As-L_DES-H_6       |                                                                                        |
| As-L_DES-H_7       | BAP-L: ~50ug/L (~200nM)<br>As-H (Arsenic): 40mg/L (~4000nM)<br>DES-H: 10 ug/L (37.3nM) |
| As-L_DES-H_8       |                                                                                        |
| BAP-L_AS-H_DES-H_1 |                                                                                        |
| BAP-L_AS-H_DES-H_2 |                                                                                        |
| BAP-L_AS-H_DES-H_5 |                                                                                        |
| BAP-L_AS-H_DES-H_3 |                                                                                        |
| BAP-L_AS-H_DES-H_6 |                                                                                        |
| BAP-L_AS-H_DES-H_7 |                                                                                        |
| BAP-L_AS-H_DES-H_9 | BAP-L: ~50ug/L (~200nM)<br>As-L (Arsenic): 4mg/L (~400nM)<br>DES-H: 10 ug/L (37.3nM)   |
| BAP-L_AS-L_DES-H_1 |                                                                                        |
| BAP-L_AS-L_DES-H_4 |                                                                                        |
| BAP-L_AS-L_DES-H_5 |                                                                                        |
| BAP-L_AS-L_DES-H_6 |                                                                                        |
| BAP-L_AS-L_DES-H_7 |                                                                                        |
| BAP-L_AS-L_DES-H_8 |                                                                                        |
| BAP-H_AS-H_DES-H_2 |                                                                                        |
| BAP-H_AS-H_DES-H_3 |                                                                                        |
| BAP-H_AS-H_DES-H_6 |                                                                                        |
| BAP-H_AS-H_DES-H_8 |                                                                                        |
| BAP-H_AS-H_DES-H_9 |                                                                                        |
| W.Control_1        | water<br>(control)                                                                     |
| W.Control_2        |                                                                                        |
| W.Control_4        |                                                                                        |
| W.Control_5        |                                                                                        |
| W.Control_7        |                                                                                        |

**Group IV (Dataset IV)**

|               |                                                                                                    |
|---------------|----------------------------------------------------------------------------------------------------|
| BAP-L_As-H_1  | BAP-L: ~50ug/L (~200nM)<br>As-H (Arsenic): 40mg/L (~4000nM)<br>(Arsenic purchased from Sigma, USA) |
| BAP-L_As-H_2  |                                                                                                    |
| BAP-L_As-H_3  |                                                                                                    |
| BAP-L_As-H_5  |                                                                                                    |
| BAP-L_As-H_7  |                                                                                                    |
| BAP-L_As-H_8  |                                                                                                    |
| BAP-H_As-H_1  |                                                                                                    |
| BAP-H_As-H_2  |                                                                                                    |
| BAP-H_As-H_3  | BAP-H: ~500ug/L (~2000nM)<br>As-H (Arsenic): 40mg/L (~4000nM)                                      |
| BAP-H_As-H_4  |                                                                                                    |
| BAP-H_As-H_6  |                                                                                                    |
| BAP-H_As-H_7  |                                                                                                    |
| BAP-H_As-H_8  | BAP-H: ~500ug/L (~2000nM)<br>DES-H: 10 ug/L (37.3nM)                                               |
| BAP-H_DES-H_1 |                                                                                                    |
| BAP-H_DES-H_4 |                                                                                                    |
| BAP-H_DES-H_6 | BAP-H: ~500ug/L (~2000nM)<br>DES-L: 1 ug/L (3.73nM)                                                |
| BAP-H_DES-L_1 |                                                                                                    |
| BAP-H_DES-L_4 |                                                                                                    |
| BAP-H_DES-L_5 |                                                                                                    |
| BAP-H_DES-L_6 |                                                                                                    |
| BAP-H_DES-L_7 |                                                                                                    |
| BAP-H_DES-L_9 |                                                                                                    |

\* Experimental groups that were used to obtain discriminatory gene sets for training of prediction models (dataset III).

**Supplementary Table 1 (continued).**

---

**EXPERIMENT C (Tissue-Specific Biomarker Validation Experiment)**

---

**Tissue-specific Samples (brain, gills, liver, gut, skin, testis and eyes were sampled)**

|             |   |                                          |
|-------------|---|------------------------------------------|
| V.Control_1 | } | Vehicle alone (Control)<br>acetone 0.01% |
| V.Control_2 |   |                                          |
| V.Control_3 |   |                                          |
| V.Control_4 |   |                                          |
| V.Control_5 |   |                                          |
| BAP_1       | } | BAP: ~250ug/L (~1000nM)                  |
| BAP_2       |   |                                          |
| BAP_3       |   |                                          |
| BAP_4       |   |                                          |
| BAP_5       |   |                                          |
| DES_1       | } | DES: 5 ug/L (18.7nM)                     |
| DES_2       |   |                                          |
| DES_3       |   |                                          |
| DES_4       |   |                                          |
| DES_5       |   |                                          |

---

Except for 17-beta-estradiol and diethylstilbestrol which was selected based on vitellogenin transcript induction, the exposure concentrations for the remaining compounds were selected based on preliminary acute toxicity tests that produced about 10%-20% mortality within 96 hours of treatment. Concentrations for benzo[a]pyrene were reduced 10- to 100-fold for experiment B and C. We reason that these concentrations would produce a spectrum of responses/effects ranging from adaptive to toxicity.
