# Supplementary material for: Zebrafish Whole-Adult-Organism Chemogenomics for Large-Scale Predictive and Discovery Chemical Biology
Source: PubMed Central journal article supplement (PMC2442223; doi:10.1371/journal.pgen.1000121), 2008-07-11
Supplement: pgen.1000121.s004.pdf [file pgen.1000121.s004.pdf]

**Supplementary Table 2. Selection Criteria And Number of Genes Selected For Discriminatory Gene Sets Used For Training of Prediction Models.**

| <b>Discriminatory Gene Sets</b>                                               | <b>Criteria For Gene Selection*</b>                                                                | <b>Number of Selected Genes</b> |
|-------------------------------------------------------------------------------|----------------------------------------------------------------------------------------------------|---------------------------------|
| <b><u>Discriminatory Gene Sets Selected From Dataset I For Training</u></b>   |                                                                                                    |                                 |
| Q-val_P(H)AHs                                                                 | fold-difference>1.5, Q-value<1% in P(H)AH group, Q-value>20% in EC group                           | 70                              |
| Q-val_EC                                                                      | fold-difference>1.5, Q-value<1% in EC group, Q-value>20% in P(H)AH group                           | 51                              |
| FDR-val_P(H)AHs                                                               | fold-difference>1.5, FDR-value<0.025 in P(H)AH group, FDR-value>0.2 in EC group                    | 49                              |
| FDR-val_EC                                                                    | fold-difference>1.5, FDR-value<0.025 in EC, FDR-value>0.2 in P(H)AH group                          | 57                              |
| P-val_P(H)AHs                                                                 | fold-difference>1.5, P-value<0.0001 in P(H)AH group, P-value>0.01 in EC group                      | 42                              |
| P-val_EC                                                                      | fold-difference>1.5, P-value<0.0001 in EC group, P-value>0.01 in P(H)AH group                      | 34                              |
| <b><u>Discriminatory Gene Sets Selected From Dataset III For Training</u></b> |                                                                                                    |                                 |
| Q-val_P(H)AHs                                                                 | fold-difference>1.5, Q-value<1% in BAP_Low or BAP_High, Q-value>20% in DES_High and DES_Low        | 165                             |
| Q-val_EC                                                                      | fold-difference>1.5, Q-value<1% in DES_Low or DES_High, Q-value>20% in BAP_High and BAP_Low        | 161                             |
| FDR-val_P(H)AHs                                                               | fold-difference>1.5, FDR-value<0.025 in BAP_Low or BAP_High, FDR-value>0.2 in DES_High and DES_Low | 24                              |
| FDR-val_EC                                                                    | fold-difference>1.5, FDR-value<0.025 in DES_Low or DES_High, FDR-value>0.2 in BAP_High and BAP_Low | 15                              |
| P-val_P(H)AHs                                                                 | fold-difference>1.5, P-value<0.0001 in BAP_Low or BAP_High, P-value>0.01 in DES_High and DES_Low   | 26                              |
| P-val_EC                                                                      | fold-difference>1.5, P-value<0.0001 in DES_Low or DES_High, P-value>0.01 in BAP_High and BAP_Low   | 40                              |

\*The stringent criteria is used to ensure high confidence of discriminatory power within a relatively small number of selected genes, although this will likely exclude many other responsive genes.
