# Supplementary material for: Zebrafish Whole-Adult-Organism Chemogenomics for Large-Scale Predictive and Discovery Chemical Biology
Source: PubMed Central journal article supplement (PMC2442223; doi:10.1371/journal.pgen.1000121), 2008-07-11
Supplement: pgen.1000121.s005.pdf [file pgen.1000121.s005.pdf]

**Supplementary Table 3.** Summary of the Performance of Prediction Models Trained Using Dataset I (Figure 1) and Dataset III (Figure 2)

|                                                                                                         | Prediction Models for P(H)AHs |          |          |          |          |          | Prediction Models for ECs |          |          |          |          |          |
|---------------------------------------------------------------------------------------------------------|-------------------------------|----------|----------|----------|----------|----------|---------------------------|----------|----------|----------|----------|----------|
|                                                                                                         | kNN                           |          |          | SVM      |          |          | kNN                       |          |          | SVM      |          |          |
|                                                                                                         | Q-val                         | FDR-val  | P-val    | Q-val    | FDR-val  | P-val    | Q-val                     | FDR-val  | P-val    | Q-val    | FDR-val  | P-val    |
| <u>Leave-one-out validation on Dataset I [also used as Training Set (Figure 1B)]</u>                    |                               |          |          |          |          |          |                           |          |          |          |          |          |
| True Positive (TP)                                                                                      | 13                            | 13       | 13       | 13       | 13       | 13       | 12                        | 12       | 12       | 12       | 12       | 12       |
| False Positive (FP)                                                                                     | 0                             | 0        | 0        | 0        | 0        | 0        | 0                         | 0        | 0        | 0        | 0        | 0        |
| True Negative (TN)                                                                                      | 17                            | 17       | 17       | 17       | 17       | 17       | 18                        | 18       | 18       | 18       | 18       | 18       |
| False Negative (FN)                                                                                     | 0                             | 0        | 0        | 0        | 0        | 0        | 0                         | 0        | 0        | 0        | 0        | 0        |
| Total                                                                                                   | 30                            | 30       | 30       | 30       | 30       | 30       | 30                        | 30       | 30       | 30       | 30       | 30       |
| Specificity (%) [TN/(TN+FP)]*                                                                           | 100                           | 100      | 100      | 100      | 100      | 100      | 100                       | 100      | 100      | 100      | 100      | 100      |
| Sensitivity (%) [TP/(TP+FN)]**                                                                          | 100                           | 100      | 100      | 100      | 100      | 100      | 100                       | 100      | 100      | 100      | 100      | 100      |
| Fisher's Exact Test [P-value]                                                                           | 8.35E-09                      | 8.35E-09 | 8.35E-09 | 8.35E-09 | 8.35E-09 | 8.35E-09 | 1.16E-08                  | 1.16E-08 | 1.16E-08 | 1.16E-08 | 1.16E-08 | 1.16E-08 |
| <u>Independent Validation on Dataset II and III [using Dataset I as training set (Figure 1C and D)]</u> |                               |          |          |          |          |          |                           |          |          |          |          |          |
| True Positive (TP)                                                                                      | 10                            | 10       | 10       | 10       | 10       | 10       | 9                         | 9        | 9        | 9        | 9        | 9        |
| False Positive (FP)                                                                                     | 0                             | 0        | 0        | 0        | 0        | 0        | 0                         | 0        | 0        | 0        | 0        | 0        |
| True Negative (TN)                                                                                      | 61                            | 61       | 61       | 61       | 61       | 61       | 62                        | 62       | 62       | 62       | 62       | 62       |
| False Negative (FN)                                                                                     | 0                             | 0        | 0        | 0        | 0        | 0        | 0                         | 0        | 0        | 0        | 0        | 0        |
| Total                                                                                                   | 71                            | 71       | 71       | 71       | 71       | 71       | 71                        | 71       | 71       | 71       | 71       | 71       |
| Specificity (%) [TN/(TN+FP)]                                                                            | 100                           | 100      | 100      | 100      | 100      | 100      | 100                       | 100      | 100      | 100      | 100      | 100      |
| Sensitivity (%) [TP/(TP+FN)]                                                                            | 100                           | 100      | 100      | 100      | 100      | 100      | 100                       | 100      | 100      | 100      | 100      | 100      |
| Fisher's Exact Test [P-value]                                                                           | 2.17E-12                      | 2.17E-12 | 2.17E-12 | 2.17E-12 | 2.17E-12 | 2.17E-12 | 1.34E-11                  | 1.34E-11 | 1.34E-11 | 1.34E-11 | 1.34E-11 | 1.34E-11 |
| <u>Independent Validation on Dataset IV [using Dataset I as training set (Figure 1E)]</u>               |                               |          |          |          |          |          |                           |          |          |          |          |          |
| True Positive (TP)                                                                                      | 27                            | 34       | 35       | 25       | 37       | 36       | 40                        | 40       | 40       | 40       | 40       | 40       |
| False Positive (FP)                                                                                     | 0                             | 0        | 0        | 0        | 0        | 0        | 0                         | 0        | 0        | 0        | 0        | 0        |
| True Negative (TN)                                                                                      | 18                            | 18       | 18       | 18       | 18       | 18       | 18                        | 18       | 18       | 18       | 18       | 18       |
| False Negative (FN)                                                                                     | 13                            | 6        | 5        | 15       | 3        | 4        | 0                         | 0        | 0        | 0        | 0        | 0        |
| Total                                                                                                   | 58                            | 58       | 58       | 58       | 58       | 58       | 58                        | 58       | 58       | 58       | 58       | 58       |
| Specificity (%) [TN/(TN+FP)]                                                                            | 100                           | 100      | 100      | 100      | 100      | 100      | 100                       | 100      | 100      | 100      | 100      | 100      |
| Sensitivity (%) [TP/(TP+FN)]                                                                            | 67.5                          | 85       | 87.5     | 62.5     | 92.5     | 90       | 100                       | 100      | 100      | 100      | 100      | 100      |
| Fisher's Exact Test [P-value]                                                                           | 4.69E-07                      | 2.99E-10 | 7.48E-11 | 2.39E-06 | 2.96E-12 | 1.63E-11 | 2.22E-15                  | 2.22E-15 | 2.22E-15 | 2.22E-15 | 2.22E-15 | 2.22E-15 |

Specificity (%) [TN/(TN+FP)]\* is the proportion of true negatives of all negative cases of the samples tested and it measures how well the 'classification test' correctly identifies negative cases.

Sensitivity (%) [TP/(TP+FN)]\*\* is the proportion of true positives of all positive cases of the samples tested and it measures how well the 'classification test' correctly identifies positive cases.

**Supplementary Table 3. (Continued)**

|                                                                                                         | Prediction Models for P(H)AHs |          |          |          |          |          | Prediction Models for ECs |          |          |          |          |          |
|---------------------------------------------------------------------------------------------------------|-------------------------------|----------|----------|----------|----------|----------|---------------------------|----------|----------|----------|----------|----------|
|                                                                                                         | kNN                           |          |          | SVM      |          |          | kNN                       |          |          | SVM      |          |          |
|                                                                                                         | Q-val                         | FDR-val  | P-val    | Q-val    | FDR-val  | P-val    | Q-val                     | FDR-val  | P-val    | Q-val    | FDR-val  | P-val    |
| <u>Leave-one-out validation on Dataset III [also used as Training Set (Figure 2B)]</u>                  |                               |          |          |          |          |          |                           |          |          |          |          |          |
| True Positive (TP)                                                                                      | 10                            | 10       | 10       | 10       | 10       | 10       | 9                         | 9        | 9        | 9        | 9        | 9        |
| False Positive (FP)                                                                                     | 0                             | 0        | 0        | 0        | 0        | 0        | 0                         | 0        | 0        | 0        | 0        | 0        |
| True Negative (TN)                                                                                      | 15                            | 15       | 15       | 15       | 15       | 15       | 16                        | 16       | 16       | 16       | 16       | 16       |
| False Negative (FN)                                                                                     | 0                             | 0        | 0        | 0        | 0        | 0        | 0                         | 0        | 0        | 0        | 0        | 0        |
| Total                                                                                                   | 25                            | 25       | 25       | 25       | 25       | 25       | 25                        | 25       | 25       | 25       | 25       | 25       |
| Specificity (%) [TN/(TN+FP)]*                                                                           | 100                           | 100      | 100      | 100      | 100      | 100      | 100                       | 100      | 100      | 100      | 100      | 100      |
| Sensitivity (%) [TP/(TP+FN)]**                                                                          | 100                           | 100      | 100      | 100      | 100      | 100      | 100                       | 100      | 100      | 100      | 100      | 100      |
| Fisher's Exact Test [P-value]                                                                           | 3.06E-07                      | 3.06E-07 | 3.06E-07 | 3.06E-07 | 3.06E-07 | 3.06E-07 | 4.89E-07                  | 4.89E-07 | 4.89E-07 | 4.89E-07 | 4.89E-07 | 4.89E-07 |
| <u>Independent Validation on Dataset I and II [using Dataset III as training set (Figure 2C and D)]</u> |                               |          |          |          |          |          |                           |          |          |          |          |          |
| True Positive (TP)                                                                                      | 13                            | 13       | 13       | 13       | 13       | 13       | 10                        | 11       | 11       | 10       | 11       | 11       |
| False Positive (FP)                                                                                     | 1                             | 1        | 1        | 1        | 1        | 1        | 0                         | 0        | 0        | 0        | 0        | 0        |
| True Negative (TN)                                                                                      | 62                            | 62       | 62       | 62       | 62       | 62       | 64                        | 64       | 64       | 64       | 64       | 64       |
| False Negative (FN)                                                                                     | 0                             | 0        | 0        | 0        | 0        | 0        | 2                         | 1        | 1        | 2        | 1        | 1        |
| Total                                                                                                   | 76                            | 76       | 76       | 76       | 76       | 76       | 76                        | 76       | 76       | 76       | 76       | 76       |
| Specificity (%) [TN/(TN+FP)]                                                                            | 98.4                          | 98.4     | 98.4     | 98.4     | 98.4     | 98.4     | 100                       | 100      | 100      | 100      | 100      | 100      |
| Sensitivity (%) [TP/(TP+FN)]                                                                            | 100                           | 100      | 100      | 100      | 100      | 100      | 83.3                      | 91.7     | 91.7     | 83.3     | 91.7     | 91.7     |
| Fisher's Exact Test [P-value]                                                                           | 9.17E-14                      | 9.17E-14 | 9.17E-14 | 9.17E-14 | 9.17E-14 | 9.17E-14 | 6.91E-11                  | 2.10E-12 | 2.10E-12 | 6.91E-11 | 2.10E-12 | 2.10E-12 |
| <u>Independent Validation on Dataset IV [using Dataset III as training set (Figure 2E)]</u>             |                               |          |          |          |          |          |                           |          |          |          |          |          |
| True Positive (TP)                                                                                      | 38                            | 38       | 36       | 39       | 37       | 37       | 40                        | 40       | 40       | 40       | 40       | 40       |
| False Positive (FP)                                                                                     | 1                             | 0        | 0        | 0        | 0        | 0        | 0                         | 0        | 0        | 0        | 0        | 0        |
| True Negative (TN)                                                                                      | 17                            | 18       | 18       | 18       | 18       | 18       | 18                        | 18       | 18       | 18       | 18       | 18       |
| False Negative (FN)                                                                                     | 2                             | 2        | 4        | 1        | 3        | 3        | 0                         | 0        | 0        | 0        | 0        | 0        |
| Total                                                                                                   | 58                            | 58       | 58       | 58       | 58       | 58       | 58                        | 58       | 58       | 58       | 58       | 58       |
| Specificity (%) [TN/(TN+FP)]                                                                            | 94.4                          | 100      | 100      | 100      | 100      | 100      | 100                       | 100      | 100      | 100      | 100      | 100      |
| Sensitivity (%) [TP/(TP+FN)]                                                                            | 95                            | 95       | 90       | 97.5     | 92.5     | 92.5     | 100                       | 100      | 100      | 100      | 100      | 100      |
| Fisher's Exact Test [P-value]                                                                           | 1.49E-11                      | 4.22E-13 | 1.63E-11 | 4.22E-14 | 2.96E-12 | 2.96E-12 | 2.22E-15                  | 2.22E-15 | 2.22E-15 | 2.22E-15 | 2.22E-15 | 2.22E-15 |

Specificity (%) [TN/(TN+FP)]\* is the proportion of true negatives of all negative cases of the samples tested and it measures how well the 'classification test' correctly identifies negative cases.

Sensitivity (%) [TP/(TP+FN)]\*\* is the proportion of true positives of all positive cases of the samples tested and it measures how well the 'classification test' correctly identifies positive cases.
