# Supplementary material for: Zebrafish Whole-Adult-Organism Chemogenomics for Large-Scale Predictive and Discovery Chemical Biology
Source: PubMed Central journal article supplement (PMC2442223; doi:10.1371/journal.pgen.1000121), 2008-07-11
Supplement: pgen.1000121.s006.pdf [file pgen.1000121.s006.pdf]

Supplementary Table 4. Selected BAP- or DES- responsive genes validated to be significant ( $P < 0.05$ ) in whole fish using real-time PCR.

| Genbank Acc                                                              | Description                                                 | Gene Symbol | Log 2 Fold Difference<br>(Microarray) | ***Log 2 Fold Difference<br>(PCR) |
|--------------------------------------------------------------------------|-------------------------------------------------------------|-------------|---------------------------------------|-----------------------------------|
| <b><u>BAP-responsive genes in P(H)AH Discriminatory Gene Set</u></b>     |                                                             |             |                                       |                                   |
| AW342687                                                                 | Cytochrome P450, family 1, subfamily A *                    | cyp1A       | 4.06                                  | 5.44                              |
| AF057713                                                                 | Cytochrome P450, family 1, subfamily A, polypeptide1 *      | cyp1A1      | 3.90                                  | 3.97                              |
| BM183152                                                                 | CDNA clone IMAGE:7177046                                    |             | 1.41                                  | 2.82                              |
| BG303549                                                                 | Carbonic anhydrase II                                       | ca2         | 1.31                                  | 2.06                              |
| BI430015                                                                 | Zgc:92102                                                   | zgc:92102   | 1.28                                  | 2.36                              |
| AI353694                                                                 | GIF homolog                                                 | gif         | 1.26                                  | 1.63                              |
| BG306468                                                                 | TIPARP homolog *                                            | TIPARP      | 1.24                                  | 1.97                              |
| AI959735                                                                 | SULT6B1 homolog                                             | SULTB1      | 0.98                                  | 2.35                              |
| AF285098                                                                 | Glutathione S-transferase pi *                              | gstp1       | 0.90                                  | 1.00                              |
| AI601682                                                                 | CYB5A homolog                                               | cyb5a       | 0.74                                  | 1.64                              |
| BI891596                                                                 | NAD(P)H dehydrogenase, quinone 1 *                          | nqo1        | 0.72                                  | 1.49                              |
| AI477969                                                                 | GRHL3 homolog                                               | grhl3       | 0.63                                  | 0.96                              |
| AW232207                                                                 | Transcribed locus                                           |             | 0.62                                  | 3.17                              |
| AF063446                                                                 | Aryl hydrocarbon receptor 2 *                               | ahr2        | 0.62                                  | 1.41                              |
| AI667240                                                                 | Carboxypeptidase B1                                         | cpb1        | -0.64                                 | -1.03                             |
| AI397347                                                                 | KRT17 homolog                                               | krt17       | -1.30                                 | -0.81                             |
| <b><u>BAP-responsive genes in Non-P(H)AH Discriminatory Gene Set</u></b> |                                                             |             |                                       |                                   |
| BM025955                                                                 | Transcribed locus                                           |             | 1.31                                  | 3.23                              |
| BG304178                                                                 | Transcribed locus                                           |             | 0.71                                  | 0.49                              |
| AI793886                                                                 | Wu:fc55f04                                                  | wu:fc55f04  | 0.40                                  | 0.34                              |
| AW232794                                                                 | Sortilin 1                                                  | sort1       | 0.60                                  | 1.31                              |
| BI878941                                                                 | Zgc:77849                                                   | zgc:77849   | 0.56                                  | 1.15                              |
| AW018635                                                                 | Transforming growth factor, beta-inducec                    | tgfb1       | -0.46                                 | -1.30                             |
| AW233556                                                                 | Wu:fj37e01                                                  | Wu:fj37e01  | -0.59                                 | -0.33                             |
| AF295407                                                                 | Alcohol dehydrogenase 8a                                    | adh8a       | -0.79                                 | -1.57                             |
| BG304220                                                                 | Wu:fl33b06                                                  | wu:fl33b06  | -1.12                                 | -1.18                             |
| AF064835                                                                 | Eukaryotic translation elongation factor 2, like            | eef2l       | -1.16                                 | -1.12                             |
| AW421939                                                                 | Hm:zeh1207                                                  | Hm:zeh1207  | -1.52                                 | -1.07                             |
| <b><u>DES-responsive genes in EC Discriminatory Gene Set</u></b>         |                                                             |             |                                       |                                   |
| AF406784                                                                 | vitellogenin 1 **                                           | vg1         | 6.07                                  | 12.3                              |
| AF254638                                                                 | Vitellogenin 3, phosvitinless **                            | vg3         | 5.88                                  | 12.87                             |
| BI427744                                                                 | FK506 binding protein 11 **                                 | fkbp11      | 2.68                                  | 3.31                              |
| BG891864                                                                 | Carboxypeptidase N, polypeptide 1                           | cpn1        | 2.51                                  | 2.88                              |
| BI839255                                                                 | Wu:fb78c04                                                  | wu:fb78c04  | 2.23                                  | 0.59                              |
| BM082666                                                                 | Zgc:92744                                                   | zgc:92744   | 2.09                                  | 1.97                              |
| AI522628                                                                 | Wu:fb60e09                                                  | wu:fb60e09  | 1.86                                  | 1.74                              |
| BI889078                                                                 | High density lipoprotein-binding protein (vigilin)          | hdlbp       | 1.39                                  | 1.31                              |
| AW175541                                                                 | Wu:fi36e01                                                  | wu:fi36e01  | 1.33                                  | 2.29                              |
| BF717944                                                                 | Transcribed locus, moderately similar to XP_416256.1        |             | 1.28                                  | 4.74                              |
| BF717555                                                                 | nuclear protein 1                                           | nupr1       | 1.20                                  | 3.52                              |
| BI885968                                                                 | Signal sequence receptor, delta                             | ssr4        | 1.17                                  | 1.37                              |
| BI882727                                                                 | Signal sequence receptor, alpha                             | ssr1        | 1.16                                  | 1.19                              |
| BM182319                                                                 | Solute carrier family 31 (copper transporters), member 1    | slc31a1     | 1.10                                  | 1.40                              |
| AF349412                                                                 | Estrogen receptor 1 **                                      | esr1        | 0.79                                  | 4.60                              |
| BI896378                                                                 | Zgc:66313                                                   | zgc:66313   | 0.58                                  | 1.65                              |
| BF717503                                                                 | Serine (or cysteine) proteinase inhibitor, clade C member 1 | serpinc1    | -0.61                                 | -0.89                             |
| AW342687                                                                 | Cytochrome P450, family 1, subfamily A *                    | cyp1A       | -0.77                                 | -0.95                             |
| BF156623                                                                 | Uncoupling protein 4                                        | ucp4        | -1.12                                 | -1.83                             |
| AW019201                                                                 | Complement Component 9                                      | c9          | -2.03                                 | -2.35                             |
| AW115757                                                                 | Hemopexin                                                   |             | -3.37                                 | -3.23                             |
| <b><u>DES-responsive genes in Non-ECs Discriminatory Gene Set</u></b>    |                                                             |             |                                       |                                   |
| BI878941                                                                 | Zgc:77849                                                   | zgc:77849   | 0.86                                  | 0.73                              |
| BI981380                                                                 | Wu:fj36g07                                                  | wu:fj36g07  | 0.67                                  | 0.38                              |
| AF057713                                                                 | Cytochrome P450, family 1, subfamily A, polypeptide1        | cyp1A1      | -0.35                                 | -0.65                             |
| AW421213                                                                 | Phenylalanine hydroxylase                                   | pah         | -0.95                                 | -0.68                             |
| BG985468                                                                 | Fructose-1,6-bisphosphatase 1                               | fbp1        | -1.08                                 | -2.09                             |
| AI722510                                                                 | MGC:103610 IMAGE:7250917                                    |             | -1.38                                 | -2.11                             |
| AW019124                                                                 | Alanine-glyoxylate aminotransferase                         | agxt        | -1.42                                 | -1.47                             |

\* Known BAP-responsive genes.

\*\* Known Estrogen-responsive genes.

\*\*\* All values shown are significant ( $P$ -value<0.05; n=4-5) by heterocedastic T-Test when compared to their respective control group.
