# Supplementary material for: Zebrafish Whole-Adult-Organism Chemogenomics for Large-Scale Predictive and Discovery Chemical Biology
Source: PubMed Central journal article supplement (PMC2442223; doi:10.1371/journal.pgen.1000121), 2008-07-11
Supplement: pgen.1000121.s008.pdf [file pgen.1000121.s008.pdf]

**Supplementary Table 6.** Biological associations of the EC-deregulated human homologs (70) generated by Ingenuity Pathway Analysis (IPA) software.

| Description of Biological Association          | P-value           | Molecules (human homologs) Involved |            |                                                                                                                                        |
|------------------------------------------------|-------------------|-------------------------------------|------------|----------------------------------------------------------------------------------------------------------------------------------------|
|                                                |                   | Number                              | Percentage | *Gene Symbol                                                                                                                           |
| <b><u>Molecular and Cellular Functions</u></b> |                   |                                     |            |                                                                                                                                        |
| Small Molecule Biochemistry                    | 8.63E-05-4.76E-02 | 22                                  | 31.4%      | SERPINA1,APOB,CYP51A1,CYP1A1,MAOB,PGK1,HDLBP,ESR1,CPN1,S<br>C4MOL,PISD,DIO2,CHPT1,NPC2,GPX4,CYP2C19,FKBP4,CDO1,ACSL4,U<br>CP2,XBP1,HPX |
| Cellular Growth and Proliferation              | 4.03E-03-4.43E-02 | 22                                  | 31.4%      | SERPINA1,CYP1A1,PSMC5,DIABLO,DAP,PGK1,PIM3,ESR1,AHSG,KLF6,<br>PTCH1,GPX4,PA2G4,QSCN6,FKBP4,POSTN,DAB2,UCP2,XBP1,PKP3,P8,<br>TXNL1      |
| Lipid Metabolism                               | 8.63E-05-4.76E-02 | 16                                  | 22.9%      | SERPINA1,APOB,CYP51A1,CYP1A1,HDLBP,ESR1,SC4MOL,PISD,CHPT1<br>,NPC2,GPX4,CYP2C19,FKBP4,ACSL4,XBP1,UCP2                                  |
| Molecular Transport                            | 1.62E-04-4.24E-02 | 14                                  | 20.0%      | APOB,SLC22A2,SLC30A7,SLC31A1,ESR1,DIO2,GPX4,FKBP4,CDO1,ACS<br>L4,UCP2,XBP1,TXNL1,HPX                                                   |
| Cellular Assembly and Organization             | 5.4E-03-4.24E-02  | 11                                  | 15.7%      | DNM2,REPS1,TMED10,FKBP4,ANXA13,CLINT1,DAB2,TRIM63,XBP1,SER<br>P1,PTCH1                                                                 |
| Gene Expression                                | 5.4E-03-4.76E-02  | 10                                  | 14.3%      | PA2G4,GPX4,CYP1A1,CALCOCO1,ESR1,UCP2,DAB2,KLF6,CISH,SNP1                                                                               |
| Amino Acid Metabolism                          | 5.4E-03-4.24E-02  | 8                                   | 11.4%      | CYP51A1,CYP1A1,MAOB,CYP2C19,LDHB,CDO1,CPN1,DIO2                                                                                        |
| Protein Synthesis                              | 2.07E-02-4.76E-02 | 8                                   | 11.4%      | APOB,CYP1A1,PGA5,RPL30,EIF4G3,CPN1,PABPC4,RRBP1                                                                                        |
| Cellular Function and Maintenance              | 2.63E-03-4.76E-02 | 7                                   | 10.0%      | DNM2,REPS1,FKBP4,CLINT1,ESR1,UCP2,DAB2                                                                                                 |
| Cellular Development                           | 5.4E-03-4.43E-02  | 7                                   | 10.0%      | DIABLO,POSTN,ESR1,DAB2,XBP1,P8,PKP3                                                                                                    |
| Drug Metabolism                                | 1.54E-03-4.76E-02 | 5                                   | 7.1%       | GPX4,CYP1A1,CYP2C19,PGK1,ESR1                                                                                                          |
| Protein Degradation                            | 3.74E-03-3.74E-03 | 5                                   | 7.1%       | PSMB6,PSMC6,PSMC5,PSMC2,PSMD13                                                                                                         |
| Cellular Movement                              | 5.4E-03-4.24E-02  | 5                                   | 7.1%       | DNM2,APOB,POSTN,ESR1,PKP3                                                                                                              |
| Vitamin and Mineral Metabolism                 | 1.01E-03-3.2E-02  | 4                                   | 5.7%       | NPC2,CYP1A1,CYP2C19,DIO2                                                                                                               |
| Cell Death                                     | 5.4E-03-4.76E-02  | 4                                   | 5.7%       | APOB,ESR1,UCP2,DAB2                                                                                                                    |
| Cell Morphology                                | 5.4E-03-3.2E-02   | 4                                   | 5.7%       | TMED10,ESR1,TRIM63,XBP1                                                                                                                |
| Nucleic Acid Metabolism                        | 5.4E-03-3.2E-02   | 3                                   | 4.3%       | CYP2C19,PGK1,UCP2                                                                                                                      |
| Energy Production                              | 6.17E-03-6.17E-03 | 3                                   | 4.3%       | GPX4,CDO1,TXNL1                                                                                                                        |
| Cell-To-Cell Signaling and Interaction         | 9.28E-03-4.24E-02 | 3                                   | 4.3%       | POSTN,ESR1,DAB2                                                                                                                        |
| Free Radical Scavenging                        | 5.4E-03-5.4E-03   | 1                                   | 1.4%       | SERPINA1                                                                                                                               |
| Carbohydrate Metabolism                        | 1.08E-02-3.72E-02 | 1                                   | 1.4%       | ESR1                                                                                                                                   |
| Cell Signaling                                 | 1.08E-02-1.08E-02 | 1                                   | 1.4%       | DIO2                                                                                                                                   |
| DNA Replication, Recombination, and Repair     | 1.08E-02-1.08E-02 | 1                                   | 1.4%       | PTCH1                                                                                                                                  |
| Post-Translational Modification                | 1.08E-02-1.08E-02 | 1                                   | 1.4%       | MAOB                                                                                                                                   |
| Cellular Compromise                            | 2.67E-02-2.67E-02 | 1                                   | 1.4%       | HPX                                                                                                                                    |
| Cell Cycle                                     | 4.24E-02-4.24E-02 | 1                                   | 1.4%       | ESR1                                                                                                                                   |

\* Gene symbol in red or green lettering indicates that the gene is up- or down-regulated, respectively.

**Supplementary Table 6. (Continued)**

| Description of Biological Association                   | P-value           | Molecules (human homologs) Involved |            |                                                          |
|---------------------------------------------------------|-------------------|-------------------------------------|------------|----------------------------------------------------------|
|                                                         |                   | Number                              | Percentage | *Gene Symbol                                             |
| <b>Physiological System Development and Function</b>    |                   |                                     |            |                                                          |
| Tissue Development                                      | 4.37E-03-4.56E-02 | 8                                   | 11.4%      | <b>EMILIN1,RBP4,POSTN,ESR1,DAB2,PTCH1,DIO2,CISH</b>      |
| Skeletal and Muscular System Development and Function   | 1.08E-02-4.76E-02 | 8                                   | 11.4%      | <b>DNM2,PAX1,CYP1A1,POSTN,ESR1,AHSG,TRIM63,DIO2</b>      |
| Organismal Development                                  | 1.61E-02-4.24E-02 | 8                                   | 11.4%      | <b>PAX1,SERPINC1,POSTN,SLC31A1,ESR1,DAB2,SERP1,PTCH1</b> |
| Organ Development                                       | 5.4E-03-4.24E-02  | 7                                   | 10.0%      | <b>PAX1,TMED10,ESR1,XBP1,PTCH1,DIO2,CISH</b>             |
| Endocrine System Development and Function               | 8.63E-05-4.76E-02 | 6                                   | 8.6%       | <b>PAX1,CYP1A1,CYP2C19,FKBP4,ESR1,DIO2</b>               |
| Embryonic Development                                   | 5.4E-03-3.2E-02   | 6                                   | 8.6%       | <b>RBP4,SERPINC1,POSTN,SLC31A1,DAB2,PTCH1</b>            |
| Connective Tissue Development and Function              | 1.08E-02-4.24E-02 | 6                                   | 8.6%       | <b>DNM2,PAX1,POSTN,AHSG,ESR1,PKP3</b>                    |
| Reproductive System Development and Function            | 5.4E-03-4.76E-02  | 5                                   | 7.1%       | <b>APOB,ESR1,DAB2,PTCH1,CISH</b>                         |
| Tumor Morphology                                        | 5.4E-03-4.76E-02  | 5                                   | 7.1%       | <b>PGK1,SERPINC1,ESR1,AHSG,PTCH1</b>                     |
| Organ Morphology                                        | 1.21E-03-4.76E-02 | 4                                   | 5.7%       | <b>PAX1,ESR1,XBP1,DIO2</b>                               |
| Tissue Morphology                                       | 5.4E-03-4.24E-02  | 4                                   | 5.7%       | <b>PAX1,APOB,SLC31A1,ESR1</b>                            |
| Hair and Skin Development and Function                  | 9.28E-03-4.3E-02  | 4                                   | 5.7%       | <b>POSTN,ESR1,DAB2,PTCH1</b>                             |
| Renal and Urological System Development and Function    | 1.79E-02-4.43E-02 | 4                                   | 5.7%       | <b>ESR1,PKP3,KLF6,PTCH1</b>                              |
| Immune Response                                         | 1.37E-02-3.72E-02 | 3                                   | 4.3%       | <b>GPX4,ESR1,AHSG</b>                                    |
| Cardiovascular System Development and Function          | 2.67E-02-4.76E-02 | 3                                   | 4.3%       | <b>SERPINC1,ESR1,DIO2</b>                                |
| Auditory and Vestibular System Development and Function | 5.4E-03-2.14E-02  | 2                                   | 2.9%       | <b>TMED10,DIO2</b>                                       |
| Nervous System Development and Function                 | 1.08E-02-4.24E-02 | 2                                   | 2.9%       | <b>ESR1,DIO2</b>                                         |
| Hematological System Development and Function           | 1.61E-02-3.72E-02 | 2                                   | 2.9%       | <b>ESR1,XBP1</b>                                         |
| Digestive System Development and Function               | 2.67E-02-4.24E-02 | 2                                   | 2.9%       | <b>DIABLO,XBP1</b>                                       |
| Behavior                                                | 5.4E-03-4.76E-02  | 1                                   | 1.4%       | <b>ESR1</b>                                              |
| Organismal Survival                                     | 5.4E-03-5.4E-03   | 1                                   | 1.4%       | <b>SERPINC1</b>                                          |
| Hepatic System Development and Function                 | 1.61E-02-2.67E-02 | 1                                   | 1.4%       | <b>XBP1</b>                                              |
| Respiratory System Development and Function             | 1.61E-02-1.61E-02 | 1                                   | 1.4%       | <b>ESR1</b>                                              |
| Immune and Lymphatic System Development and Function    | 2.67E-02-2.67E-02 | 1                                   | 1.4%       | <b>ESR1</b>                                              |

\* Gene symbol in red or green lettering indicates that the gene is up- or down-regulated, respectively.

Supplementary Table 6. (Continued)

| Description of Biological Association  | P-value           | Molecules (human homologs) Involved |            |
|----------------------------------------|-------------------|-------------------------------------|------------|
|                                        |                   | Number                              | Percentage |
| <b>Diseases and Disorders</b>          |                   |                                     |            |
| Cancer                                 | 4.27E-04-4.76E-02 | 14                                  | 20.0%      |
| Neurological Disease                   | 1.09E-03-4.76E-02 | 9                                   | 12.9%      |
| Genetic Disorder                       | 5.4E-03-4.76E-02  | 9                                   | 12.9%      |
| Psychological Disorders                | 3.34E-04-3.72E-02 | 6                                   | 8.6%       |
| Hematological Disease                  | 5.4E-03-3.72E-02  | 6                                   | 8.6%       |
| Inflammatory Disease                   | 5.4E-03-4.76E-02  | 5                                   | 7.1%       |
| Reproductive System Disease            | 5.4E-03-4.76E-02  | 5                                   | 7.1%       |
| Cardiovascular Disease                 | 1.08E-02-4.76E-02 | 5                                   | 7.1%       |
| Organismal Injury and Abnormalities    | 1.08E-02-3.72E-02 | 5                                   | 7.1%       |
| Developmental Disorder                 | 1.21E-03-3.72E-02 | 4                                   | 5.7%       |
| Nutritional Disease                    | 6.42E-03-2.56E-02 | 4                                   | 5.7%       |
| Hepatic System Disease                 | 1.08E-02-4.76E-02 | 4                                   | 5.7%       |
| Dermatological Diseases and Conditions | 1.08E-02-3.72E-02 | 3                                   | 4.3%       |
| Gastrointestinal Disease               | 1.53E-02-4.76E-02 | 3                                   | 4.3%       |
| Viral Function                         | 3.1E-02-4.84E-02  | 3                                   | 4.3%       |
| Metabolic Disease                      | 5.4E-03-4.76E-02  | 2                                   | 2.9%       |
| Respiratory Disease                    | 1.08E-02-4.24E-02 | 2                                   | 2.9%       |
| Skeletal and Muscular Disorders        | 1.61E-02-4.76E-02 | 2                                   | 2.9%       |
| Endocrine System Disorders             | 2.14E-02-3.2E-02  | 2                                   | 2.9%       |
| Renal and Urological Disease           | 2.14E-02-4.24E-02 | 2                                   | 2.9%       |
| Immunological Disease                  | 3.2E-02-3.72E-02  | 1                                   | 1.4%       |
| Connective Tissue Disorders            | 4.76E-02-4.76E-02 | 1                                   | 1.4%       |

\* Gene symbol in red or green lettering indicates that the gene is up- or down-regulated, respectively.
